# Supplementary material
Source: publisher site journal article supplement (http://static.cambridge.org/content/id/urn:cambridge.org:id:article:S1832427419000240/resource/name/S1832427419000240supp001.xlsx)
Supplement: Supplementary file 1 [file S1832427419000240supp001.xlsx]

## Sheet: Sheet1
Table S5. Distribution of perinatal and delivery characteristics in low-, intermediate- and high-Apgar score groups in first and second-born twin
		1st born																2nd born
		APGAR 1 MIN (<7)		(7-9)		(10)				APGAR 5 MIN (<7)		(7-9)		(10)				APGAR 1 MIN (<7)		(7-9)		(10)				APGAR 5 MIN (<7)		(7-9)		(10)
		N	%	N	%	N	%	Total		N	%	N	%	N	%	Total		N	%	N	%	N	%	Total		N	%	N	%	N	%	Total
Total		382	7.6	3950	78.2	716	14.2	5048 (missing 133)		136	2.8	1424	29.5	3264	67.7	4824 (missing 357)		806	16.1	3591	71.9	600	12	4997 (missing 184)		169	3.5	1939	40.4	2691	56.1	4799 (missing 382)
Zygosity
	MZ	155	0.09	1371	79.5%	199	11.5%	1725		63	3.8%	529	0.32	1059	64.1%	1651		260	32.3%	1267	35.3%	184	30.7%	1711		72	4.4%	663	40.2%	914	55.4%	1649
	DZ	227	6.8%	2579	77.6%	517	15.6%	3323		73	2.3%	895	28.2%	2205	69.5%	3173		546	67.7%	2324	64.7%	416	69.3%	3286		97	3.1%	1276	40.5%	1777	56.4%	3150
Sex
	male	204	0.08	1991	78.5%	340	13.4%	2535		81	3.3%	724	29.9%	1620	66.8%	2425		430	53.3%	1771	49.3%	310	51.7%	2511		98	4.1%	976	40.4%	1341	55.5%	2415
	female	178	7.1%	1959	0.78	376	0.15	2513		55	2.3%	700	29.2%	1644	68.5%	2399		376	46.7%	1820	50.7%	290	48.3%	2486		71	0.03	963	40.4%	1350	56.6%	2384
Gestational age (weeks)
	Mean (SD)	34.46 (3.49)		36.4(2.22)		36.9(1.71)		34.3(3.78)		35.3(2.89)		36.8(1.78)		35.1(3.26)		36.5(2.1)		35.1(3.2)		36.5(2.1)		36.9(1.61)		36.3(2.34)		34.6(3.52)		35.7(2.7)		36.9(1.7)		36.3(2.35)
	<=32	85	31.6%	176	65.4%	8	0.03	269		34	12.9%	189	71.6%	41	15.5%	264		135	50.4%	128	47.8%	5	1.9%	268		33	12.6%	200	76.3%	29	11.1%	262
	33-36	181	8.4%	1708	79.2%	268	12.4%	2157		57	2.8%	700	34.1%	1298	63.2%	2055		373	17.5%	1551	72.8%	207	9.7%	2131		83	4.1%	931	45.7%	1024	50.2%	2038
	>=37	116	4.4%	2066	78.8%	440	16.8%	2622		45	1.8%	535	21.4%	1925	76.8%	2505		298	11.5%	1912	73.6%	388	14.9%	2598		53	2.1%	808	32.3%	1638	65.5%	2499
Mother's age at birth (years)
	Mean (SD)	32(4.24)		31.7(4.16)		32.1(4.17)		31.7(4.32)		31.7(4.22)		31.8(4.13)		31.9(4.1)		31.7(4.21)		31.9(4.06)		31.7(4.21)		32.14(4.04)		31.8(4.17)		31.5(4.47)		31.6(4.12)		31.9(4.18)		31.8(4.17)
	20-29	114	7.7%	1190	79.9%	186	12.5%	1490		44	3.1%	448	31.3%	941	65.7%	1433		224	15.2%	1105	74.8%	148	0.1	1477		55	3.9%	608	42.6%	765	53.6%	1428
	30-39	248	7.3%	2632	77.6%	511	15.1%	3391		85	2.6%	922	28.5%	2226	68.9%	3233		548	16.3%	2369	70.6%	437	0.13	3354		104	3.2%	1271	39.6%	1837	57.2%	3212
	>40	20	0.12	128	76.6%	19	11.4%	167		7	4.4%	54	34.2%	97	61.4%	158		34	20.5%	117	70.5%	15	0.09	166		10	6.3%	60	37.7%	89	0.56	159
Mother's BMI at birth
	Mean (SD)	30.5 (5.68)		30.3 (4.75)		30.48 (4.61)		30.4 (4.81)		30.41 (5.47)		30.41 (5.11)		30.4 (4.65)		30.41 (4.82)		30.2 (5.25)		30.4 (4.73)		30.6 (4.52)		30.4 (4.79)		30.6 (5.51)		30.2 (5.02)		30.5 (4.59)		30.4 (4.8)
	<25	45	9.7%	356	77.1%	61	13.2%	462		17	3.8%	139	31.4%	286	64.7%	442		95	20.7%	317	69.2%	46	0.1	458		20	4.6%	207	47.2%	212	48.3%	439
	25-30	144	7.1%	1598	0.79	280	13.8%	2022		52	2.7%	576	29.9%	1300	67.4%	1928		317	15.9%	1446	72.5%	232	11.6%	1995		64	3.3%	777	40.6%	1073	56.1%	1914
	>30	160	7.2%	1737	78.6%	313	14.2%	2210		55	2.6%	609	28.7%	1459	68.7%	2123		332	15.2%	1583	72.3%	276	12.6%	2191		69	3.3%	827	39.1%	1218	57.6%	2114
Father's age at birth (years)
	Mean (SD)	34.5(5.4)		34.4(5.1)		34.4(5.09)		34.4(5.12)		34(5.25)		34.2(5.37)		34.5(4.97)		34.4(5.1)		34.3(5.15)		34.4(5.15)		34.6(4.85)		34.4(5.11)		34.1(5.34)		34.1(5.18)		34.6(5.05)		34.4(5.12)
	20-29	63	7.9%	617	77.3%	118	14.8%	798		25	3.3%	255	33.6%	479	63.1%	759		126	15.9%	577	72.9%	88	11.1%	791		28	3.7%	343	45.2%	388	51.1%	759
	30-39	239	7.1%	2654	78.9%	472	0.14	3365		89	2.8%	922	28.5%	2219	68.7%	3230		535	16.1%	2385	71.6%	409	12.3%	3329		109	3.4%	1293	40.3%	1804	56.3%	3206
	>40	64	0.09	554	77.5%	97	13.6%	715		16	2.3%	205	0.3	462	67.6%	683		113	15.9%	509	71.8%	87	12.3%	709		24	3.5%	248	36.5%	408	0.6	680
Mode of conception
	naturally	244	7.1%	2714	78.9%	480	0.14	3438		91	2.8%	952	0.29	2240	68.2%	3283		505	14.8%	2488	0.73	414	12.2%	3407		122	3.7%	1271	38.9%	1876	57.4%	3269
	stimulated	40	0.07	455	79.5%	77	13.5%	572		14	2.5%	166	0.3	373	67.5%	553		103	18.2%	409	72.1%	55	9.7%	567		12	2.2%	245	0.45	288	52.8%	545
	IVF/ICSI	94	9.5%	747	75.5%	148	0.15	989		28	0.03	297	31.4%	620	65.6%	945		191	19.6%	659	67.7%	124	12.7%	974		31	3.3%	410	43.6%	500	53.1%	941
Birthweight
	Mean (SD)	2140.1 (671.6)		2533.9(515.23)		2639.8 (457)		2125.6(702.9)		2331.2(602.38)		2618(459.4)		2245.5(652.38)		2501.7(513.15)		2315.9(644.55)		2546.8(505.46)		2627.5(449.07)		2519.2(532.36)		2226.5(697.74)		2399.5(586.22)		2627.5(499.48)		2521.2(533.42)
	<1500	77	33.8%	141	61.8%	10	4.4%	228		33	0.15	148	67.3%	39	17.7%	220		123	46.2%	135	50.8%	8	0.03	266		28	10.8%	191	73.7%	40	15.4%	259
	1500-2500	181	0.09	1586	78.9%	242	0.12	2009		54	2.8%	674	35.2%	1188	0.62	1916		371	17.4%	1549	72.6%	215	10.1%	2135		85	4.2%	940	45.9%	1023	0.5	2048
	>2500	122	4.4%	2214	79.2%	460	16.5%	2796		49	1.8%	599	22.4%	2027	75.8%	2675		311	12.1%	1895	73.5%	371	14.4%	2577		56	2.3%	802	32.4%	1614	65.3%	2472
Fetal presentation
	head	275	0.07	3119	79.1%	548	13.9%	3942		102	2.7%	1100	29.1%	2576	68.2%	3778		336	12.5%	1990	73.9%	368	13.7%	2694		80	3.1%	941	36.4%	1565	60.5%	2586
	non-cephalic (breach. horizontal)	103	9.5%	818	75.4%	164	15.1%	1085		32	3.1%	318	30.9%	678	0.66	1028		459	20.5%	1556	69.6%	221	9.9%	2236		87	0.04	969	0.45	1097	0.51	2153
Mode of delivery
	vaginal	123	4.7%	2127	80.8%	384	14.6%	2634		50	0.02	624	24.7%	1856	73.4%	2530		382	15.3%	1835	73.4%	283	11.3%	2500		69	2.9%	941	39.1%	1399	58.1%	2409
	caesarean planned	45	5.2%	664	77.3%	150	17.5%	859		13	1.6%	218	26.5%	591	71.9%	822		58	6.8%	649	76.6%	140	16.5%	847		12	1.5%	240	29.8%	554	68.7%	806
	urgent intervention (forceps. vacuum extraction)	61	12.6%	383	0.79	41	8.5%	485		25	5.4%	183	39.5%	255	55.1%	463		86	24.5%	236	67.2%	29	8.3%	351		12	3.5%	165	48.4%	164	48.1%	341
	urgent caesarean section	152	14.4%	765	72.4%	139	13.2%	1056		48	4.8%	395	39.6%	554	55.6%	997		271	21.7%	834	66.9%	142	11.4%	1247		74	6.2%	569	47.6%	553	46.2%	1196
Time between birth of 1st and 2d born (min)
	Mean (SD)	14.3 (34.31)		18.5 (157.39)		13.2 (18.6)		18.2 (50.43)		22.24 (251.31)		15.5 (50.11)		20.1 (32.43)		17.9 (164.56)		20.1 (32.43)		14.7 (44)		10.9 (17.59)		15.1 (40.1)		21.3(40.6)		17.5(50.1)		13.3(33)		15.3(41.1)
	<5	214	9.7%	1658	75.4%	328	14.9%	2200		67	3.2%	690	32.9%	1341	63.9%	2098		283	0.13	1593	73.1%	304	13.9%	2180		69	3.3%	787	37.9%	1223	58.8%	2079
	6-15	76	5.1%	1220	81.4%	203	13.5%	1499		38	2.6%	373	25.8%	1034	71.6%	1445		208	14.1%	1106	74.7%	166	11.2%	1480		31	2.2%	573	0.4	830	57.9%	1434
	16-60	79	6.7%	930	79.4%	162	13.8%	1171		26	2.3%	312	28.2%	769	69.5%	1107		266	0.23	770	66.6%	121	10.5%	1157		60	5.4%	490	44.1%	561	50.5%	1111
	61-1440	13	7.3%	142	79.8%	23	12.9%	178		5	2.9%	49	28.2%	120	0.69	174		49	27.2%	122	67.8%	9	0.05	180		9	5.1%	89	50.9%	77	0.44	175
Values are n(%), unless otherwise stated
